# Supplementary material
Source: Springer Nature journal article supplement (https://www.springermedizin.de/resource/supplementary/12936_2009_962_MOESM1_ESM.pdf/9548638)

Static: JDP8/ItG

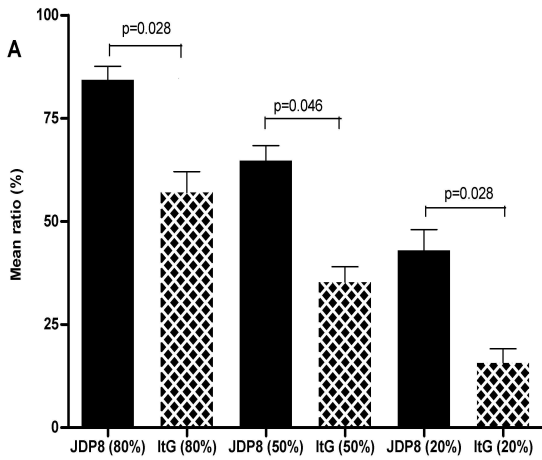

Flow: JDP8/ItG

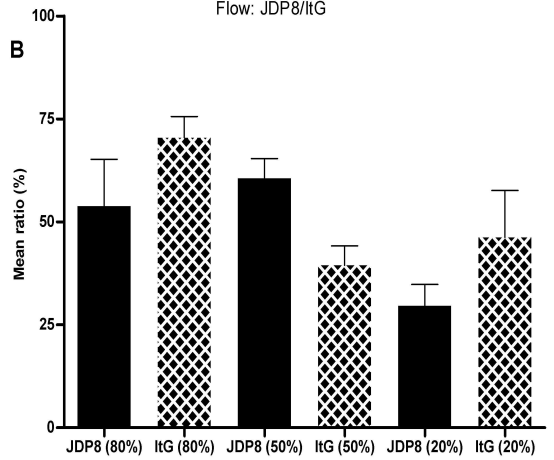

Static: JDP8/A4

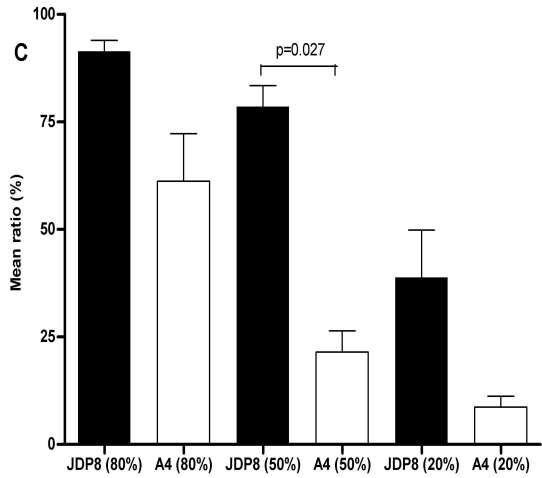

Flow: JDP8/A4

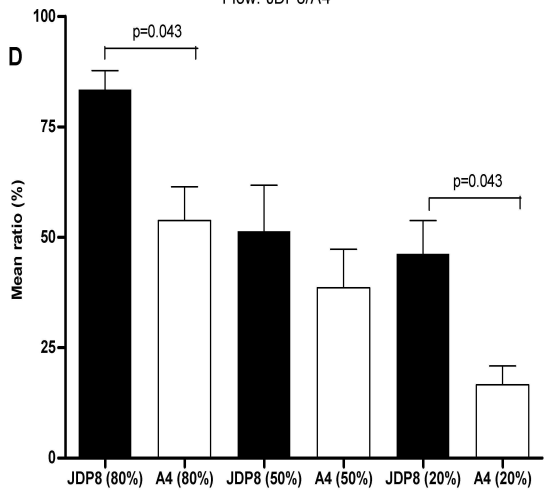

Static: ItG/A4

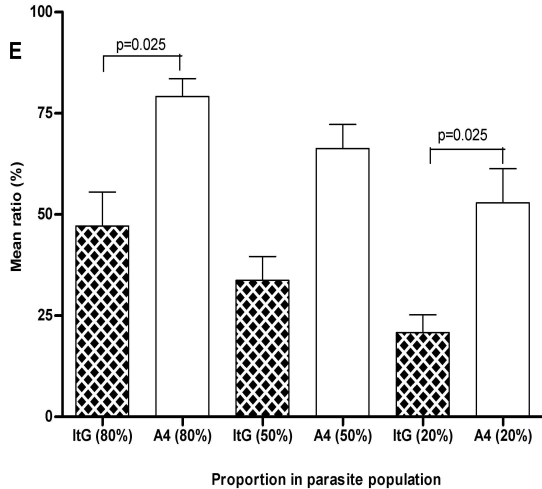

Flow: ItG/A4

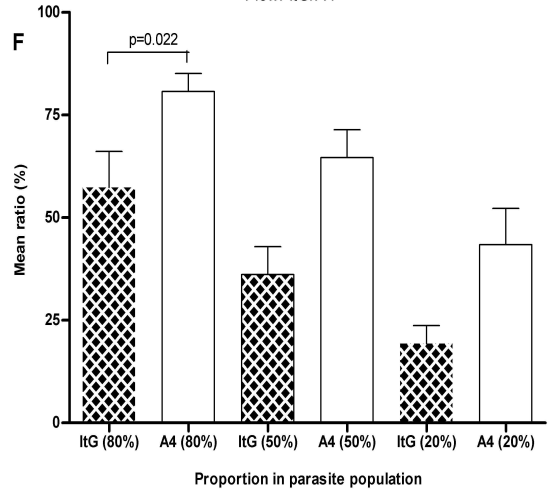

Supplement: MOESM1 [file 9548638]
